# Supplementary material for: High Quality de Novo Transcriptome Assembly of Croton tiglium
Source: Front Mol Biosci. 2018 Jul 5;5:62. doi: 10.3389/fmolb.2018.00062 (PMC6041412; doi:10.3389/fmolb.2018.00062)
Supplement: Supplementary file 6 [file Data_Sheet_3.fasta]

>Croton_tiglium_guaA_isoform1 codon optimized | GMP synthase
ATGGCGCTGGATCCAAAAGTTAAAGACCTTGTGTTGATTTTGGACTTCGGGTCACAGTACACTCATCTGATTACCCGCCGCATTCGTTCTTTTAATGTCTTCTCACTGTGTATCAGCGGTACTTCAACCTTGGATGCCATCACCTCTCTTAACCCCAAATTAGTAATTCTGTCTGGTGGACCGCATTCAGTACACTCACCCGATTGCCCTACATTTCCTAGCGGCTTTGTGGAGTGGGCACAGAAGAACGGCTGTTCAGTTTTAGGGATTTGCTATGGTTTGCAGTTAATTGTTCAACGTTTGGGCGGGGAAGTACGTATCGGCGAAAAGCAAGAATATGGACGCATGGAGATTGTGGTGGAGAGTAATTCTGGTATCTTCGGAAATAAGCGCGTAGGAGACAGCCAGGTAGTGTGGATGTCTCATGGCGATGAAACTTCCTCTTTACCGGAAGGGTTTGAGGTAGTAGCACGCTCTCAGCAGGGGGCAGTTGCCGCTGTAGAGAATCGTGAAAAGCGTTTTTATGGATTACAATATCACCCAGAAGTGACGCATTCACCCGAGGGGATGGACACATTACGTCACTTCTTGTTCGACGTCTGTGGGGTGAATGCGGGTTGGTGTATGGAAAATGTGGTAGACGAGGAAATCAAACTTATTAACAACACCGTTGCTCCTGAGGACCACGTTATTTGTGCTCTTAGCGGGGGGGTTGATTCCACGGTGGCCGCAACGTTGGTACATAAAGCAATTGGAGACCGCTTACACTGTGTCTTCGTCGACAACGGGCTTCTGCGCTATAAAGAGCGTGAACGCGTAATGGAGACCTTCGAACGTGATTTGCATTTGCCTGTTACGTGTGTTGATGCCAGCGAAGAGTTCCTGTCGAAATTAAAGGGTGTCATCGATCCAGAAATGAAGCGTAAGATTATCGGTAAGGAATTTATCTCAATCTTCGACACGTTCGCACATGACCTTGAGCAAAAGTTGGGGCGCAAGCCAGCATACCTTGTGCAAGGTACTCTTTACCCGGATGTCATCGAATCTTGTCCACCACCAGGCAGCGGGCGCACCCACAGTCATACAATTAAAAGTCACCACAACGTAGGTGGGTTACCAAAAGACATGAAGTTGAAGCTGATTGAACCGTTAAAGCTGTTGTTCAAAGACGAGGTCCGCCAGCTTGGGAAGATCTTGAATGTGCCTGAGGGATTCTTAAAACGCCATCCATTCCCAGGTCCCGGTCTGGCAGTCCGCGTTCTGGGGGACGTGACAGAAGGCAACGCCCTTGAAGTTCTTCGCCAAGTAGACGAGATCTTCATTCAGTCAATCAAGGACGCCCGCCTGTACGATAGCATTTGGCAAGCCTTCGCCGTCTTCCTGCCAATTAAATCGGTCGGAGTGCAAGGTGATCAGCGCACACATTCCCATGTAGTGGCTCTTCGTGCGGTCACATCACAGGACGGTATGACAGCGGACTGGTATCATTTTGATCACAAATTTCTGGACGACGTTTCCCGTAAGATCTGTAATTCCGTTCGTGGAGTTAATCGCGTCGTACAAGACATCACGAGTAAACCTCCGTCGACAATCGAATGGGAATGA
>Croton_tiglium_guaA_isoform2 codon optimized | GMP synthase, postulated involvement in isoGMP synthesis
ATGGCATTAGATCCTAAGGTTAAAGATCTGGTACTGATTTTAGACTTCGGGAGCCAATACACTCATCTTATTACTCGCCGTATCCGCAGCTTCAACGTCTTTTCGCTGTGCATCTCCGGCACGTCAACCCTGGATGCAATTACGTCGTTAAATCCGAAATTAGTGATCTTGTCGGGGGGCCCCCATTCCGTGCATTCTCCAGACTGCCCTACTTTCCCGTCGGGCTTTGTTGAGTGGGCTCAGAAGAATGGCTGTAGCGTGTTAGGCATTTGTTATGGCCTTCAGCTGATCGTGCAACGTCTGGGCGGCGAGGTACGTATCGGGGAAAAGCAAGAGTATGGCCGTATGGAGATCGTCGTCGAGTCGAATAGCGGAATCTTCGGTAACAAACGTGTTGGGGATTCTCAAGTTGTATGGATGTCTCATGGCGATGAAACCAGTAGCCTTCCCGAAGGATTTGAAGTAGTAGCACGCTCGCAGCAGGGAGCAGTGGCTGCCGTGGAAAACCGCGAGAAGCGCTTTTACGGTCTTCAGTATCATCCCGAGGTTACCCACAGCCCCGAAGGTATGGATACGTTGCGCTATTTTTTGCTGGATGTTTGCGGAGTCAATGCTGGATGGTCGATGGAGATGGCGGTAGATGAAGAAATTAAAGCCATCAACAATGCAGTCGCACCAGAAGATCACGTAATCTGTGCGCTTAGTGGTGGGGTCGATAGCACAGTCGCTGCTACATTAGTCCATAAGGCGATCGGCGACCGCCTTCACTGTGTGTTTGTGGATAACGGATTGTTGCGCTACAAGGAGCGTGAACGTGTGATGGAAACATTCGAGCGTGATCTGCACTTACCAGTAACATGCGTCGACGCTTCAGAGCAGTTTCTTTCTAAGCTGAAAGGAGTTGAGCACGGCGAGATGAAGCGTAAAATCATCGGTAAAGAGTTTATCTCTATCTTCGACACCTTTGCTCACGATTTGGAACAAAAATTAGGCCGTAAACCGGCTTATCTGGTGCAAGGGACATTATATCCCGACGTGATTGAGAGCTGCCCCCCGCCAGGTAGTGGTCGTACACACAGCCACACCATTAAATCCCATCACAACGTAGGAGGTTTGCCCAAGGATATGAAGCTGAAATTAATTGAGCCCCTGAAACTGCTGTTCAAGGACGAGGTTCGCCAACTGGGGAAAGTTCTGAACGTGCCGGAGGGTTTCTTAAAACGTCATCCCTTTCCAGGGCCTGGGTTAGCGGTACGTGTATTAGGGGACGTGACAGAGGGCAACGCTTTAGAAGTTCTTCGTCAGGTGGACGAGATTTTCATCCAGTCTATCAAAGATGCACGCCTTTACGACTCGATCTGGCAGGCCTTTGCTGTTTTCTTACCGATCAAAAGTGTGGGAGTGCAGGGGGACCAACGTACACACTCCCATGTGGTAGCTTTACGCGCGGTTACCAGCCAAGACGGTATGACAGCAGATTGGTATCACTTCGACCATAAATTTTTAGACGATGTGAGCCGTAAGATTTGCAACAGCGTGCGTGGAGTTAATCGTGTTGTTCAGGACATCACTTCCAAGCCTCCTTCGACCATTGAGTGGGAGTGA
